# Supplementary material
Source: PubMed Central journal article supplement (PMC6394734)
Supplement: ry181243suppa1.pdf [file ry181243suppa1.pdf]

# Imaging of kidney cysts and cystic kidney diseases in children: An International Working Group Consensus Statement

## Supplementary Materials

### *Content*

|                                                                                                                           |    |
|---------------------------------------------------------------------------------------------------------------------------|----|
| <a href="#">Appendix E1 Supplementary Methods</a> .....                                                                   | 2  |
| <a href="#">Table E1 Consensus group members</a> .....                                                                    | 3  |
| <a href="#">Table E2 Literature review on contrast enhanced ultrasound (CEUS) for complex renal cysts in adults</a> ..... | 4  |
| <a href="#">Table E3 Literature summary on Malignancy in children with a multicystic dysplastic kidney (MCDK)</a> .....   | 13 |
| <a href="#">Table E4 Literature summary on HNF1B disease (manifestations seen on medical imaging)</a> .....               | 14 |
| <a href="#">Table E5 Literature review on imaging diagnosis of ADPKD in children and young adults</a> .....               | 17 |
| <a href="#">Table E6 Literature summary on cysts in children with tuberous sclerosis complex</a> ...                      | 24 |
| <a href="#">Table E7 search strategies and number of papers screened for systematic literature reviews</a> .....          | 25 |
| <a href="#">Suggestions for further research</a> .....                                                                    | 27 |
| <a href="#">References for Supplementary Material</a> .....                                                               | 29 |

## ***Appendix E1 Supplementary Methods***

For systematic literature reviews MEDLINE and the Cochrane library were searched for relevant literature up to September 2017. The literature summary on contrast enhanced ultrasound (CEUS) was updated prior to submission in May 2018. The searches were restricted to original articles (excluding case reports) published in English, German and French. Search strategies, inclusion and exclusion criteria are listed in Table E7. Each study was assessed for validity according to criteria proposed by the Grading of Recommendations Assessment, Development and Evaluation working group (GRADE) (1). This includes ranking each study with respect to risk of bias (limitations in study design or execution), indirectness (how directly the purpose of the study was related to the question of the literature review), inconsistency (whether results were consistent across studies), and imprecision (whether study results were precise enough to draw adequate conclusions) on a scale of “not serious”, “serious” and “very serious”. The categories “serious” or “very serious” indicates that concerns in this domain led to downgrading of the evidence. Reviewers could also list other considerations (e.g. suspicion of publication bias, influence of plausible residual confounding) and rated the study for overall level of importance in answering the health question (on a scale of 1-9, where 9 is most important).

**Table E1 - Consensus group members**

| <b>Name</b>                   | <b>Area of expertise</b>                                                | <b>Working group</b>              |
|-------------------------------|-------------------------------------------------------------------------|-----------------------------------|
| <b>Avni, E. Fred</b>          | Pediatric and prenatal<br>Radiology, pediatric genitourinary<br>imaging | Technical issues,<br>tumors & TSC |
| <b>Breysem, Luc</b>           | Pediatric radiology, ADPKD                                              | ADPKD & ARPKD                     |
| <b>Burgmaier,<br/>Kathrin</b> | Pediatric nephrology, ARPKD                                             | ADPKD & ARPKD                     |
| <b>Caroli, Anna</b>           | Renal magnetic resonance<br>imaging, ADPKD                              | Technical issues,<br>tumors & TSC |
| <b>Cetiner, Metin</b>         | Pediatric nephrology, renal<br>ultrasound, Bardet-Biedl Syndrome        | Other cystic<br>nephropathies     |
| <b>Franke, Doris</b>          | Pediatric ultrasound, pediatric<br>nephrologist                         | Technical issues,<br>tumors & TSC |
| <b>Gimpel,<br/>Charlotte</b>  | Pediatric nephrology, guideline<br>preparation                          | Other cystic<br>nephropathies     |
| <b>Haffner, Dieter</b>        | Pediatric nephrology, inherited<br>kidney disease, guideline            | Other cystic<br>nephropathies     |
| <b>Hartung, Erum<br/>A.</b>   | Pediatric Nephrology,<br>polycystic kidney disease                      | Other cystic<br>nephropathies     |
| <b>König, Jens</b>            | Pediatric nephrology,<br>nephronophthisis                               | Other cystic<br>nephropathies     |
| <b>Liebau, Max C.</b>         | Pediatric nephrology, polycystic<br>kidney disease                      | ADPKD & ARPKD                     |
| <b>Mekahli, Djalila</b>       | Pediatric nephrology, polycystic<br>kidney disease                      | ADPKD & ARPKD                     |
| <b>Ong, Albert C.M.</b>       | Adult nephrology, ADPKD                                                 | ADPKD & ARPKD                     |
| <b>Pape, Lars</b>             | Pediatric nephrology, renal<br>ultrasound                               | Technical issues,<br>tumors & TSC |
| <b>Schaefer, Franz</b>        | Pediatric nephrology, inherited<br>kidney diseases, guideline           | ADPKD & ARPKD                     |
| <b>Titieni, Andrea</b>        | Pediatric nephrology                                                    | Other cystic<br>nephropathies     |
| <b>Torra, Roser</b>           | Adult nephrology, ADPKD, TSC                                            | Technical issues,<br>tumors & TSC |
| <b>Winyard, Paul<br/>J.D.</b> | Pediatric nephrology, prenatal<br>cystic kidney disease                 | Other cystic<br>nephropathies     |

**Table E2 - Literature review on contrast enhanced ultrasound (CEUS) for complex renal cysts in adults**

| Title                                                                                                                                                                            | First Author   | Journal                       | Year | Study design                                                                                          | N° & type of patients (Bosniak category on CT)                                                                                                      | Findings                                                                                                                                                                                                                                                                                                                                                                                                                                                                                                                                                                                                                          | Risk of bias | Indirectness | Inconsistency | Imprecision | Other considerations                | Importance <sup>1</sup> |
|----------------------------------------------------------------------------------------------------------------------------------------------------------------------------------|----------------|-------------------------------|------|-------------------------------------------------------------------------------------------------------|-----------------------------------------------------------------------------------------------------------------------------------------------------|-----------------------------------------------------------------------------------------------------------------------------------------------------------------------------------------------------------------------------------------------------------------------------------------------------------------------------------------------------------------------------------------------------------------------------------------------------------------------------------------------------------------------------------------------------------------------------------------------------------------------------------|--------------|--------------|---------------|-------------|-------------------------------------|-------------------------|
| <b>Studies examining CEUS for diagnosing benign vs malignant disease in (only) complex cystic renal lesions</b>                                                                  |                |                               |      |                                                                                                       |                                                                                                                                                     |                                                                                                                                                                                                                                                                                                                                                                                                                                                                                                                                                                                                                                   |              |              |               |             |                                     |                         |
| Comparison of contrast-enhanced ultrasound with MRI in the diagnosis of complex cystic renal masses: a meta-analysis.<br><br>PMID: 29363321                                      | Zhou, L.       | Acta Radiol. 59(10):1254-1263 | 2018 | Metaanalysis of studies comparing diagnostic efficacy of CEUS or MRI (using CT or follow-up > 1 year) | 17 studies with 1142 lesions (10 for CEUS, 9 for MRI)                                                                                               | <u>Pooled values for CEUS:</u><br>sensitivity:95%, specificity 84%<br>positive likelihood ratio 5.62, negative likelihood ratio 0.09<br>AUCs-SROC curves 95.66%<br>Subgroup analysis including only studies using histopathological reference standard decreased the sensitivity and specificity of CEUS (94% vs. 95% and 73% vs. 84%)<br><br><u>Pooled values for MRI:</u><br>sensitivity: 92%, specificity 91%<br>positive likelihood ratio 6.74, negative likelihood ratio 0.13<br>AUCs-SROC curves 94.65%.<br>The subgroup analysis indicated that the scanning slice thickness may influence the diagnostic efficacy of MRI. | Not serious  | Not serious  | Not serious   | Not serious | Includes non-peer-reviewed studies. | 8                       |
| Diagnostic performance of contrast-enhanced ultrasonography and magnetic resonance imaging for the assessment of complex renal cysts: A prospective study.<br><br>PMID: 28147450 | Defortescu, G. | Int J Urol. 24(3):184-189.    | 2017 | Prospective comparative study of CT, MRI and CEUS                                                     | 47 patients (age 37-76 years) with 47 Bosniak 2F or 3 cysts on CT (18-58 mm). 19 had histological confirmation, others followed-up for 17-48 months | <u>CEUS:</u> sensitivity 100%, specificity 97%, negative predictive value 100%, positive predictive value 93%, kappa = 0.95, upgraded Bosniak compared to CT in 9.<br><br><u>CT:</u> sensitivity 36%, specificity 76%; Cohen's kappa (to final diagnosis) = 0.11<br><br><u>MRI:</u> sensitivity 71%, specificity 91%, kappa = 0.64, upgraded Bosniak compared to CT in 5.                                                                                                                                                                                                                                                         | Not serious  | Not serious  | Not serious   | Adults only | 14/47 malignant lesions             | 7                       |

<sup>1</sup> Where 9 is highest and 1 is lowest

| Title                                                                                                                                                                               | First Author | Journal                          | Year | Study design                                            | N° & type of patients (Bosniak category on CT)                                                                                                           | Findings                                                                                                                                                                                                                                                                                                                                                                                                                                                                                                                                                                                                                               | Risk of bias | Indirectness | Inconsistency | Imprecision | Other considerations    | Importance <sup>1</sup> |
|-------------------------------------------------------------------------------------------------------------------------------------------------------------------------------------|--------------|----------------------------------|------|---------------------------------------------------------|----------------------------------------------------------------------------------------------------------------------------------------------------------|----------------------------------------------------------------------------------------------------------------------------------------------------------------------------------------------------------------------------------------------------------------------------------------------------------------------------------------------------------------------------------------------------------------------------------------------------------------------------------------------------------------------------------------------------------------------------------------------------------------------------------------|--------------|--------------|---------------|-------------|-------------------------|-------------------------|
| Prospective comparison of use of contrast-enhanced ultrasound and contrast-enhanced computed tomography in the Bosniak classification of complex renal cysts.<br><br>PMID: 27433270 | Ragel, M.    | Ultrasound<br>24(1):6-16.        | 2016 | Prospective comparison of contrast enhanced CT and CEUS | 46 patients (36-94 years) with 51 complex renal cysts (Bosniak I to IV, 11-107 mm). 3 had histological confirmation, others followed-up for 6-24 months. | All malignant lesions were classified as such simultaneously on both modalities by at least one observer.<br><br>CEUS gave a higher Bosniak classification than CT in 31 % of cysts by both observers.<br><br>There was complete agreement in Bosniak classification between both modalities and both observers in six cysts (11.8%). There was agreement of Bosniak classification on both modalities in 21 of 51 cysts (41.2%) for observer 1 and in 17 of 51 cysts (33.3%) for observer 2.                                                                                                                                          | Not serious  | Not serious  | Not serious   | Adults only | 3/51 malignant lesions  | 7                       |
| Bosniak classification system: a prospective comparison of CT, contrast-enhanced US, and MR for categorizing complex renal cystic masses.<br><br>PMID: 26019242                     | Graumann, O. | Acta Radiol.<br>57(11):1409-1417 | 2016 | Prospective comparative study of CT, MRI and CEUS       | 44 patients (aged 42-80 years) with 46 complex renal cysts (Bosniak II – IV). Histological confirmation in 6 lesions. CT as gold standard.               | CEUS (n=43): 79% were in agreement with CT ( $\kappa = 0.86$ ). Five BII lesions were upgraded to BIIIF and four lesions were categorized lower with CEUS.<br><br>MRI (n=41): 78% were in agreement with CT ( $\kappa = 0.91$ ). Three BII lesions were upgraded to BIIIF and six lesions were categorized one category lower.                                                                                                                                                                                                                                                                                                         | Not serious  | Not serious  | Not serious   | Adults only | 4/46 malignant          | 7                       |
| Renal Complex Cystic Masses: Usefulness of Contrast-Enhanced Ultrasound (CEUS) in Their Assessment and Its Agreement with Computed Tomography.<br><br>PMID: 27787749                | Sanz, E.     | Curr Urol Rep.<br>17(12):89.     | 2016 | Prospective comparison of CT and CEUS                   | 66 patients (median age 68 years) with 67 complex renal cysts (Bosniak II-IV). CT as gold standard.                                                      | CEUS: sensitivity 100 %, specificity 81 %, positive predictive value 70 %, and negative predictive value 100 %.<br>Kappa index shows good agreement to CT (0.71; 95 % CI 0.57-0.85), both overall and stratified by categories according to Bosniak classification.<br><br>A total of 8 lesions were discordant, and seven of eight classified as malignant by CEUS and not by CT. Of those seven lesions classified as malignant by CEUS, six (six of seven, 86 %) were malignant in the pathological exam.<br>ROC curves show the superiority of CEUS [0.91 (0.83–0.98) $p = 0.000$ ] compared to CT [0.79 (0.65–0.92) $p = 0.000$ ] | Not serious  | Not serious  | Not serious   | Adults only | 21/66 malignant (on CT) | 7                       |

| Title                                                                                                                                                           | First Author | Journal                         | Year | Study design                                  | N° & type of patients (Bosniak category on CT)                                                                                                                    | Findings                                                                                                                                                                                                                                                                                                                                                                                                                                                                                                                                                                                                                                                                                                                                                                                                                                                                  | Risk of bias | Indirectness | Inconsistency | Imprecision | Other considerations           | Importance <sup>1</sup> |
|-----------------------------------------------------------------------------------------------------------------------------------------------------------------|--------------|---------------------------------|------|-----------------------------------------------|-------------------------------------------------------------------------------------------------------------------------------------------------------------------|---------------------------------------------------------------------------------------------------------------------------------------------------------------------------------------------------------------------------------------------------------------------------------------------------------------------------------------------------------------------------------------------------------------------------------------------------------------------------------------------------------------------------------------------------------------------------------------------------------------------------------------------------------------------------------------------------------------------------------------------------------------------------------------------------------------------------------------------------------------------------|--------------|--------------|---------------|-------------|--------------------------------|-------------------------|
| Comparison of contrast-enhanced sonography with MRI in the diagnosis of complex cystic renal masses.<br><br>PMID: 25179487                                      | Chen, Y.     | J Clin Ultrasound 43(4):203-209 | 2015 | Prospective comparison of MRI and CEUS        | 59 patients (21–78 years) with 71 complex cystic renal masses (Bosniak II-IV, 8-98 mm). 43 confirmed by histology (36 malignant), others followed-up 12-40 months | <u>CEUS</u> : sensitivity 97%, specificity 71%, overall accuracy 85%<br>The agreement between the classification using CEUS and the final diagnoses was fair to good (kappa = 0.51).<br><br><u>MRI</u> : sensitivity 81%, specificity 77%, overall accuracy 79%<br>The agreement between MRI and the final diagnoses was also fair to good (kappa = 0.51).<br>The areas below the receiver operating characteristic curves of CEUS and MRI were 0.84 and 0.79, respectively.                                                                                                                                                                                                                                                                                                                                                                                              | Not serious  | Not serious  | Not serious   | Adults only | 36/71 malignant lesions. No CT | 7                       |
| Contrast-enhanced ultrasonography for evaluation of cystic renal mass: in comparison to contrast-enhanced CT and conventional ultrasound.<br><br>PMID: 24929667 | Xue, L.Y.    | Abdom Imaging. 39(6):1274-83    | 2014 | Retrospective comparison of CEUS to histology | 103 patients (aged years) compared to histopathology. CT available in 70.                                                                                         | <u>CEUS</u> : The phenomenon that solid-like component by US did not enhance by CEUS was a strong predictor of benign disease, with a positive predictive value (PPV) of 100%. Enhancement of solid, soft tissue by CEUS was highly predictive of malignancy, with a PPV of 100%. The diagnostic performance of CEUS was better than US for benign cystic lesions.<br>In malignancies, CEUS demonstrated more septa, thicker wall or septa, and more solid components than US and CECT. CEUS permitted categorization of 51.7% (30/58) and 28.6% (10/35) of malignant tumors in higher grade than by US and CECT, respectively. In benign lesions, CEUS detected more septa than CECT and correctly diagnosed benign cysts which appeared as solid lesions in US. CEUS permitted downgrading of 71.1% (32/45) and 17.1% (6/35) of benign lesions compared to US and CECT. | Not serious  | Not serious  | Not serious   | Adults only | 58/103 malignant lesions.      | 7                       |

| Title                                                                                                                                                                               | First Author | Journal                             | Year | Study design                                   | N° & type of patients (Bosniak category on CT)                                                                                                    | Findings                                                                                                                                                                                                                                                                                                                                                                                                                                                                                                                                                                                                                                                                                                                                                                                                                                                                                                                                                            | Risk of bias | Indirectness | Inconsistency | Imprecision | Other considerations    | Importance <sup>1</sup> |
|-------------------------------------------------------------------------------------------------------------------------------------------------------------------------------------|--------------|-------------------------------------|------|------------------------------------------------|---------------------------------------------------------------------------------------------------------------------------------------------------|---------------------------------------------------------------------------------------------------------------------------------------------------------------------------------------------------------------------------------------------------------------------------------------------------------------------------------------------------------------------------------------------------------------------------------------------------------------------------------------------------------------------------------------------------------------------------------------------------------------------------------------------------------------------------------------------------------------------------------------------------------------------------------------------------------------------------------------------------------------------------------------------------------------------------------------------------------------------|--------------|--------------|---------------|-------------|-------------------------|-------------------------|
| Comparison of contrast-enhanced sonography with unenhanced sonography and contrast-enhanced CT in the diagnosis of malignancy in complex cystic renal masses.<br><br>PMID: 18806171 | Quaia, E.    | AJR Am J Roentgenol. 191(4):1239-49 | 2008 | Retrospective comparative study of CT and CEUS | 41 patients (29-84 years) with 41 complex cystic lesions on CT (20-80 mm). 30 histologically confirmed others followed-up for 12-24 months.       | <p><u>CEUS</u>: sensitivity: reader 1: 86%, reader 2: 86%, reader 3: 95%<br/>Specificity: reader 1: 79%, reader 2: 79%, reader 3: 63%<br/>overall diagnostic accuracy: reader 1: 83%, reader 2: 83%, reader 3: 80%</p> <p><u>CT</u>: sensitivity: reader 1: 81%, reader 2: 81%, reader 3: 95%<br/>Specificity: reader 1: 68%, reader 2: 42%, reader 3: 42%<br/>overall diagnostic accuracy: reader 1: 75%, reader 2: 63%, reader 3: 70%</p> <p><u>US</u>: sensitivity: reader 1: 48%, reader 2: 48%, reader 3: 43%<br/>Specificity: reader 1: 11%, reader 2: 11%, reader 3: 16%<br/>overall diagnostic accuracy: reader 1: 30%, reader 2: 30%, reader 3: 30%</p> <p>CEUS was better than US in diagnostic performance and confidence (p&lt;0.05) for all readers. CEUS was better than CT in diagnostic performance (sensitivity, specificity, positive and negative predictive value and accuracy for all readers except reader 3, were sensitivity was equal.</p> | Not serious  | Not serious  | Not serious   | Adults only | 21/40 malignant lesions | 7                       |
| Complex cystic renal masses: characterization with contrast-enhanced US.<br><br>PMID: 17392251                                                                                      | Ascenti, G.  | Radiology. 243(1):158-65.           | 2007 | Prospective comparative study of US and CEUS   | 40 patients (31-77 years) with 44 complex cystic renal masses (Bosniak II-IV). Confirmation on histology (n=9), or follow-up (n=31, 12-24 months) | <p><u>CEUS</u>: Complete concordance between contrast-enhanced US and CT was observed in the differentiation of surgical and nonsurgical complex cysts. Complete concordance among the three readers in the assessment of vascularity with CEUS was found. Concordance between CEUS and CT in the evaluation of vascularization was high (kappa = 0.77, P &lt; 0.001).</p> <p><u>CT</u>: complete concordance between the readers was found for classification with CT.<br/>Inter-observer agreement in the evaluation of enhancement on CT images was high (kappa = 0.88, P &lt; .001).</p> <p><u>US</u>: high inter-observer agreement was high (kappa = 0.86, P &lt; 0.001) for classification</p>                                                                                                                                                                                                                                                               | Not serious  | Not serious  | Not serious   | Adults only | 5/44 malignant lesions  | 7                       |

| Title                                                                                                                                                                 | First Author  | Journal                           | Year | Study design                                                                               | N° & type of patients (Bosniak category on CT)                                                                                 | Findings                                                                                                                                                                                                                                                                                                                                                                                                                                                                                          | Risk of bias            | Indirectness | Inconsistency | Imprecision                                   | Other considerations                                             | Importance <sup>1</sup> |
|-----------------------------------------------------------------------------------------------------------------------------------------------------------------------|---------------|-----------------------------------|------|--------------------------------------------------------------------------------------------|--------------------------------------------------------------------------------------------------------------------------------|---------------------------------------------------------------------------------------------------------------------------------------------------------------------------------------------------------------------------------------------------------------------------------------------------------------------------------------------------------------------------------------------------------------------------------------------------------------------------------------------------|-------------------------|--------------|---------------|-----------------------------------------------|------------------------------------------------------------------|-------------------------|
| Assessment of cystic renal masses based on Bosniak classification: comparison of CT and contrast-enhanced US.<br><br>PMID: 17097844                                   | Park, B.K.    | Eur J Radiol. 61(2):310-4         | 2007 | Retrospective study comparing CT and CEUS                                                  | 31 patients (26-68 years) with 31 cystic renal masses (Bosniak I-III, 8-97mm). All histologically confirmed.                   | CEUS: diagnostic accuracy 90%<br>CT: diagnostic accuracy 71% (P>0.05 for difference to CEUS).<br><br>CEUS and CT images showed same Bosniak classification in 23 (74%) lesions and there were differences in 8 (26%) lesions, all of which were upgraded by CEUS.<br>CEUS images depicted more septa in 10 (32%) lesions, more thickened wall and/or septa in 4 (13%) lesions, and stronger enhancement in 19 (61%) lesions. For six lesions, solid component was detected by CEUS but not by CT. | Not serious             | Not serious  | Not serious   | Adults only                                   | Only 3/31 lesions are not malignant                              | 5                       |
| <b>Studies examining CEUS for diagnosing benign vs malignant disease in complex and solid cystic renal lesions</b>                                                    |               |                                   |      |                                                                                            |                                                                                                                                |                                                                                                                                                                                                                                                                                                                                                                                                                                                                                                   |                         |              |               |                                               |                                                                  |                         |
| Diagnostic accuracy of contrast-enhanced ultrasound for characterization of kidney lesions in patients with and without chronic kidney disease.<br><br>PMID: 28793871 | Chang, E.H.   | BMC Nephrol. 18(1):266            | 2017 | Prospective comparison of CEUS with histology (n=23) or follow-up imaging (n=21)           | 44 Patients (n=25 with chronic kidney disease, n=19 without) with cystic and solid indeterminate or suspicious kidney lesions. | CEUS:<br>sensitivity 96% (95% CI: 84%, 99%)<br>specificity of 50% (95% CI: 32%, 68%)<br><br><u>Among patients with chronic kidney disease, CEUS</u><br>sensitivity 90% (95% CI: 56%, 98%),<br>specificity 55% (95% CI: 36%, 73%)                                                                                                                                                                                                                                                                  | Not serious             | Not serious  | Not serious   | Not serious                                   | 21/44 malignancies. Much lower rate of histology in CKD + group. | 4                       |
| Contrast-Enhanced Ultrasound Classification of Previously Indeterminate Renal Lesions.<br><br>PMID: 28429490                                                          | Zarzour, J.G. | J Ultrasound Med. 36(9):1819-1827 | 2017 | Retrospective comparison of CEUS to final diagnosis by histologic examination or follow-up | 41 out of 134 patients with 41 indeterminate lesions, who either had histological confirmation (n=16) or follow-up > 1 year    | CEUS: sensitivity 100% (20 of 20; 95% CI, 83%–100%; P<0.0001); specificity 86% (18 of 21; 95% CI, 62%–97%; P5.0026); positive predictive value 87% (20 of 23; 95% CI, 66%–97%; P5.0005), negative predictive value 100% (18 of 18; 95% CI, 81%–100%, p<0.001) accuracy 90% (37 of 41; 95% CI, 80%-98%, p<0.001)                                                                                                                                                                                   | Short minimum follow-up | Not serious  | Not serious   | Adults only, mix of cystic and solid lesions. | 15 / 94 malignancies                                             | 4                       |



| Title                                                                                                                                                                   | First Author    | Journal                                | Year | Study design                                                                               | N° & type of patients (Bosniak category on CT)                                                   | Findings                                                                                                                                                                                                                                                                                                                                                   | Risk of bias | Indirectness | Inconsistency | Imprecision                                   | Other considerations     | Importance <sup>1</sup> |
|-------------------------------------------------------------------------------------------------------------------------------------------------------------------------|-----------------|----------------------------------------|------|--------------------------------------------------------------------------------------------|--------------------------------------------------------------------------------------------------|------------------------------------------------------------------------------------------------------------------------------------------------------------------------------------------------------------------------------------------------------------------------------------------------------------------------------------------------------------|--------------|--------------|---------------|-----------------------------------------------|--------------------------|-------------------------|
| Minimally Complex Renal Cysts: Outcomes and Ultrasound Evaluation Compared with Contrast-Enhanced Cross-Sectional Imaging Bosniak Classification.<br><br>PMID: 28755789 | Destefani, M.H. | Ultrasound Med Biol. 43(10):2167-2173. | 2017 | Retrospective comparison of CEUS to CT/MRI or histology                                    | 51 minimally complex cysts and 47 complex cysts.                                                 | No sensitivity and specificity values given.<br>All minimally complex cysts on US were benign.<br><br>The inter-observer agreement on use of a k-test for US classification of complex/MC was 0.704 (95% confidence interval [CI] 0.517–0.892, p<0.001).<br>For CT/MRI classification, inter-observer agreement was 0.745 (95% CI 0.631–0.859, p < 0.001). | Not serious  | Not serious  | Not serious   | Not serious                                   | Not serious              | 3                       |
| Contrast-enhanced ultrasound of the kidney: a single-institution experience.<br><br>PMID: 29218489                                                                      | Oon, S.F.       | Ir J Med Sci. 187(3):795-802           | 2017 | Retrospective comparison of CEUS to CT/MRI or histology                                    | 31 patients (7 solid renal lesions, 21 cystic renal lesions and 3 'indeterminate' renal lesions) | No sensitivity and specificity values given.                                                                                                                                                                                                                                                                                                               | Not serious  | Not serious  | Not serious   | Not serious                                   | 16/31 malignant lesions  | 3                       |
| Diagnostic performance of contrast-enhanced ultrasound in the evaluation of renal masses in patients with renal impairment.<br><br>PMID: 27770118                       | Yong, C.        | Med J Malaysia. 71(4):193-198.         | 2016 | Retrospective comparison of CEUS to final diagnosis by histologic examination or follow-up | 63 patients (aged 28-92 years) with 74 indeterminate renal lesions (4-79mm) and reduced GFR      | CEUS: sensitivity 96% (95% CI 77.2-99.9) specificity 94% (95% CI 84.1-98.8%)<br>PPV 88% (95% CI 68-97%)<br>NPV 98% (95% CI 89-100%)<br><br>1 false negative case was a small carcinoma.                                                                                                                                                                    | Not serious  | Not serious  | Not serious   | Adults only, mix of cystic and solid lesions. | 22/74 malignant lesions  | 4                       |
| The role of contrast-enhanced ultrasound in the classification of CT-indeterminate renal lesions.<br><br>PMID: 27609413                                                 | Edenberg, J.    | Scand J Urol. 50(6):445-451            | 2016 | Comparison of CEUS to CT                                                                   | 140 patients (mean age 64 years) with 148 indeterminate renal lesions (5-166 mm)                 | CEUS:<br>Sensitivity 100%, specificity 94%<br>positive predictive value 87%<br>negative predictive value 100%<br><br>Bosniak category III: 4 malignant, 3 benign on surgery<br>Bosniak category IV: 7 malignant, 0 benign on surgery<br>Problem: category II not followed up.                                                                              | Not serious  | Not serious  | Not serious   | Adults only                                   | 18/140 malignant lesions | 4                       |

| Title                                                                                                                | First Author   | Journal                              | Year | Study design                                                   | N° & type of patients (Bosniak category on CT)                                                                                                                                     | Findings                                                                                                                                                                                                                                                                                                                                                                                                                                                                                                                                                                                         | Risk of bias | Indirectness | Inconsistency | Imprecision                                   | Other considerations          | Importance <sup>1</sup> |
|----------------------------------------------------------------------------------------------------------------------|----------------|--------------------------------------|------|----------------------------------------------------------------|------------------------------------------------------------------------------------------------------------------------------------------------------------------------------------|--------------------------------------------------------------------------------------------------------------------------------------------------------------------------------------------------------------------------------------------------------------------------------------------------------------------------------------------------------------------------------------------------------------------------------------------------------------------------------------------------------------------------------------------------------------------------------------------------|--------------|--------------|---------------|-----------------------------------------------|-------------------------------|-------------------------|
| Renal Masses With Equivocal Enhancement at CT: Characterization With Contrast-Enhanced Ultrasound.<br>PMID: 25905962 | Bertolotto, M. | AJR Am J Roentgenol. 204(5): W557-65 | 2015 | Retrospective characterization of equivocal CT lesions on CEUS | 47 patients (age 38-88 years) with 47 renal lesions (8-77mm), with histology in 30 and follow up (> 3 years) in others.                                                            | <u>CEUS</u> : The diagnostic performance of contrast-enhanced ultrasound to characterize the lesions as benign or malignant was high for both readers (AUC, 0.958 and 0.966, respectively). Interreader agreement for cystic/solid classification was complete. 12 likely complex cystic lesions at US were cystic also on CEUS and reference procedures. Eleven of 34 lesions that appeared solid at US were cystic on CEUS and reference procedures. One lesion considered likely solid by one radiologist and possibly cystic by the other was a solid tumor at CEUS and histologic analysis. | Not serious  | Not serious  | Not serious   | Adults only, mix of cystic and solid lesions. | 30/47 malignant lesions       | 4                       |
| Prospective evaluation of CT indeterminate renal masses using US and contrast-enhanced ultrasound.<br>PMID: 25209216 | Nicolau, C.    | Abdom Imaging. 40(3):542-51.         | 2015 | Prospective comparison of CT, US and CEUS                      | 72 patients (aged 34-92 years) with 83 indeterminate renal lesions (Bosniak I-IV or solid). Final diagnosis by histology or follow-up > 23 months with a conclusive imaging study. | <u>CEUS</u> : sensitivity of 96%, specificity of 94%, and overall accuracy of 95%.<br><u>US</u> : sensitivity of 36%, specificity of 52%, and overall accuracy of 42%.                                                                                                                                                                                                                                                                                                                                                                                                                           | Not serious  | Not serious  | Not serious   | Adults only, mix of cystic and solid lesions. | 28/83 (34%) malignant lesions | 6                       |

| Title                                                                                                                     | First Author | Journal                        | Year | Study design                                  | N° & type of patients (Bosniak category on CT)                                                                                                                                                                                                                           | Findings                                                                                                                                                                                                                                                                                                                                                                                                                                                                                                                                                                                                                                                                                                                                                                                                                                                                                                                | Risk of bias                        | Indirectness | Inconsistency | Imprecision                                                                           | Other considerations                                  | Importance <sup>1</sup> |
|---------------------------------------------------------------------------------------------------------------------------|--------------|--------------------------------|------|-----------------------------------------------|--------------------------------------------------------------------------------------------------------------------------------------------------------------------------------------------------------------------------------------------------------------------------|-------------------------------------------------------------------------------------------------------------------------------------------------------------------------------------------------------------------------------------------------------------------------------------------------------------------------------------------------------------------------------------------------------------------------------------------------------------------------------------------------------------------------------------------------------------------------------------------------------------------------------------------------------------------------------------------------------------------------------------------------------------------------------------------------------------------------------------------------------------------------------------------------------------------------|-------------------------------------|--------------|---------------|---------------------------------------------------------------------------------------|-------------------------------------------------------|-------------------------|
| Evaluation of indeterminate renal masses with contrast-enhanced US: a diagnostic performance study.<br><br>PMID: 24475802 | Barr, R.G.   | Radiology.<br>271(1):133-42    | 2014 | Retrospective comparison of CT, MRI and CEUS. | 721 patients (17-95 years) with 1018 indeterminate renal masses (2-161 mm) on CT, MRI or conventional US. 265 patients (306 lesions) have a confirmed diagnosis, of which only 10 patients (10 lesions) have benign cystic lesions and 37 patients (61 lesions) are AML. | <p><u>per-patient analysis in cases with confirmed diagnosis:</u><br/>sensitivity 100% (126 of 126; 95% CI: 97%, 100%)<br/>specificity 95% (132 of 139; 95% CI: 99%, 98%)<br/>PPV 95% (126 of 133), NPV 100% (132 of 132).</p> <p><u>per-patient analysis in cases with confirmed diagnosis:</u><br/>sensitivity 100% (139 of 139; 95% CI: 97%, 100%)<br/>specificity 95% (159 of 167; 95% CI: 918%, 98%),<br/>positive predictive value 95% (139 of 147),<br/>negative predictive value 100% (159 of 159).</p> <p>Visualization of occasional bubbles or a constant flow of bubbles without nodularity within a fine septation of a cystic mass is a benign finding (16 of 16, 100%).</p> <p>Angiomyolipomas (61 of 61, 100%) enhance less than normal renal cortex does, often with a peripheral distribution, while echogenic renal cell carcinoma (7 of 7, 100%) have diffuse intense enhancement with washout.</p> | Not serious                         | Not serious  | Not serious   | Adults only, but starting at 17 years, mix of cystic and solid lesions.               | 139/306 (45%) malignant lesions. Large series         | 5                       |
| Diagnostic accuracy of contrast-enhanced ultrasound for renal cell carcinoma: a meta-analysis.<br><br>PMID: 24659450      | Wang, C.     | Tumour Biol.<br>35(7):6343-50. | 2014 | Meta-Analysis of 11 studies                   | 567 patients with RCC and 313 with benign renal tumors                                                                                                                                                                                                                   | <p>Pooled sensitivity for diagnosing RCC: 88% (95% CI 85-90%)<br/>Pooled specificity for diagnosing RCC: 80% (95% CI 75-85%)</p>                                                                                                                                                                                                                                                                                                                                                                                                                                                                                                                                                                                                                                                                                                                                                                                        | Mainly Asian cohort (10/11 papers). | Not serious  | Not serious   | Adults only. 5/11 studies published in Chinese only. Mix of cystic and solid lesions. | 567/880 (64%) malignant lesions. Ghost-written paper? | 6                       |

| Title                                                                                                                                                                                                           | First Author       | Journal                                 | Year | Study design                                                              | N° & type of patients (Bosniak category on CT)                                                                                                | Findings                                                                                                                                                                                                                                 | Risk of bias                                            | Indirectness | Inconsistency | Imprecision  | Other considerations                                                     | Importance <sup>1</sup> |
|-----------------------------------------------------------------------------------------------------------------------------------------------------------------------------------------------------------------|--------------------|-----------------------------------------|------|---------------------------------------------------------------------------|-----------------------------------------------------------------------------------------------------------------------------------------------|------------------------------------------------------------------------------------------------------------------------------------------------------------------------------------------------------------------------------------------|---------------------------------------------------------|--------------|---------------|--------------|--------------------------------------------------------------------------|-------------------------|
| <b>Studies examining CEUS for diagnosing benign vs malignant disease in acquired cystic kidney disease in ESRD / after renal transplantation</b>                                                                |                    |                                         |      |                                                                           |                                                                                                                                               |                                                                                                                                                                                                                                          |                                                         |              |               |              |                                                                          |                         |
| Contrast-enhanced ultrasound (CEUS) as a new technique to characterize suspected renal transplant malignancies in renal transplant patients in comparison to standard imaging modalities.<br><br>PMID: 29630539 | Mueller-Peltzer, K | Clin Hemorheol Microcirc. 69(1-2):69-75 | 2018 | Prospective comparison of CEUS to CT (n=15) or MRI (n=7) as gold standard | 22 renal transplant patients with suspected renal transplant malignancies.<br><br>Age 28.2 years to 74.6 (mean age 55.7 years; SD±13.0 years) | sensitivity 100%, specificity 94%<br>positive predictive value (PPV) 80%<br>negative predictive value (NPV) of 100%                                                                                                                      | Not serious                                             | Not serious  | Not serious   | Adults only. | Not only ACDK, i.e. Cystic and solid lesions (unclear how many of each). | 5                       |
| Contrast-enhanced ultrasound assessment of complex cystic lesions in renal transplant recipients with acquired cystic kidney disease: preliminary experience.<br><br>PMID: 22974874                             | Paudice, N.        | Transplant Proc. 44(7):1928-9           | 2012 | Prospective comparison of US and CEUS (CT only in some cases!)            | 15 patients with 34 indeterminate lesions on US.                                                                                              | CEUS revealed Bosniak category III or above in 4 patients, all of whom had histologically confirmed malignancy. However, the others were only followed by CEUS (length of time not given), without further CT or histological evaluation | CEUS category II were not confirmed by CT or pathology. | Not serious  | Not serious   | Small study. |                                                                          | 4                       |

AUCs-SROC curve: area under the curve in the summary receiver operating characteristic curve

CECT: contrast enhanced CT

CEUS: contrast enhanced ultrasound

CT: computer tomography

MRI: magnetic resonance imaging

US: ultrasound

**Table E3 - Literature summary on Malignancy in children with a multicystic dysplastic kidney (MCDK)**

| No of Studies & Reference | Study designs                                                                         | Incidence of malignancy | Follow up                                                                                         | Risk of bias | Indirectness | Inconsistency | Imprecision | Other considerations                      |
|---------------------------|---------------------------------------------------------------------------------------|-------------------------|---------------------------------------------------------------------------------------------------|--------------|--------------|---------------|-------------|-------------------------------------------|
| <b>Malignancy</b>         |                                                                                       |                         |                                                                                                   |              |              |               |             |                                           |
| 41<br>(Refs 2–17)         | 15 cohort studies after 2005 and 1 systematic review of 26 cohort studies before 2005 | 0/ 2335 = 0%            | Not given in 7.<br>Shortest median follow up: 23 months.<br>Longest median follow up: 10.1 years. | Serious      | Not serious  | Not serious   | Not serious | Majority do not have follow-up > 10 years |

**Table E4 - Literature summary on HNF1B disease (manifestations seen on medical imaging)**

| No of studies & references                                             | Study design                                                                       | N <sup>o</sup> of events | N <sup>o</sup> of patients | Event rate (range) | Risk of bias              | Indirectness | Inconsistency | Imprecision |
|------------------------------------------------------------------------|------------------------------------------------------------------------------------|--------------------------|----------------------------|--------------------|---------------------------|--------------|---------------|-------------|
| <b>prenatal radiological findings in patients with HNF1B – disease</b> |                                                                                    |                          |                            |                    |                           |              |               |             |
| <b>abnormal renal ultrasound</b>                                       |                                                                                    |                          |                            |                    |                           |              |               |             |
| 9 (18–26)                                                              | retrospective analysis of prenatal ultrasound in patients with HNF1B including TOP | 230                      | 386                        | 60% (31-100%)      | very serious <sup>2</sup> | not serious  | Serious       | not serious |
| <b>renal cysts</b>                                                     |                                                                                    |                          |                            |                    |                           |              |               |             |
| 6 (18,20–22,25,27)                                                     | prenatal ultrasound in patients with HNF1B alteration including TOP                | 66                       | 120                        | 55% (34-100%)      | Serious <sup>2</sup>      | not serious  | Serious       | not serious |
| <b>hyperechoic kidneys</b>                                             |                                                                                    |                          |                            |                    |                           |              |               |             |
| 5 (18,20,22,24,25)                                                     | retrospective analysis of prenatal ultrasound in patients with HNF1B including TOP | 73                       | 125                        | 58% (25-77%)       | very serious <sup>2</sup> | not serious  | Serious       | not serious |
| <b>normal renal size</b>                                               |                                                                                    |                          |                            |                    |                           |              |               |             |
| 4 (20,22,25,27)                                                        | prenatal ultrasound in patients with HNF1B including TOP                           | 67                       | 105                        | 64% (40-89%)       | Serious <sup>3</sup>      | not serious  | Serious       | serious     |
| <b>increased renal size</b>                                            |                                                                                    |                          |                            |                    |                           |              |               |             |
| 4 (20,22,25,27)                                                        | prenatal ultrasound in patients with HNF1B including TOP                           | 20                       | 105                        | 19% (0-60%)        | Serious <sup>3</sup>      | not serious  | Serious       | serious     |
| <b>unilateral renal agenesis</b>                                       |                                                                                    |                          |                            |                    |                           |              |               |             |
| 6 (18,20,22,24,25,27)                                                  | prenatal ultrasound in patients with HNF1B including TOP                           | 7                        | 126                        | 6% (0-13%)         | not serious               | not serious  | not serious   | not serious |
| <b>unilateral renal hypoplasia/dysplasia/MCDK</b>                      |                                                                                    |                          |                            |                    |                           |              |               |             |
| 7 (18,20–22,24,25,27)                                                  | prenatal ultrasound in patients with HNF1B including TOP                           | 19                       | 150                        | 13 % (0-50%)       | Serious <sup>4</sup>      | not serious  | Serious       | not serious |
| <b>bilateral renal hypoplasia/dysplasia/MCDK</b>                       |                                                                                    |                          |                            |                    |                           |              |               |             |
| 7 (18,20–22,24,25,27)                                                  | prenatal ultrasound in patients with HNF1B including TOP                           | 9                        | 150                        | 6 % (0-33%)        | Serious <sup>2</sup>      | not serious  | not serious   | not serious |

<sup>2</sup> Selected cohorts (i.e. suspicion of HNF1b often based on abnormal renal ultrasound findings)

<sup>3</sup> Variable definitions of increased kidney size

<sup>4</sup> Different unilateral findings grouped together

| No of studies & references                                                    | Study design                                  | N° of events  | N° of patients | Event rate (range) | Risk of bias              | Indirectness | Inconsistency | Imprecision  |
|-------------------------------------------------------------------------------|-----------------------------------------------|---------------|----------------|--------------------|---------------------------|--------------|---------------|--------------|
| <b>radiological findings in patients with HNF1β – disease from 0-16 years</b> |                                               |               |                |                    |                           |              |               |              |
| <b>abnormal renal ultrasound</b>                                              |                                               |               |                |                    |                           |              |               |              |
| 5 (20,24,28–30)                                                               | retrospective analysis of patients with HNF1B | 104           | 109            | 95% (50-100%)      | very serious <sup>2</sup> | not serious  | not serious   | not serious  |
| <b>renal cysts</b>                                                            |                                               |               |                |                    |                           |              |               |              |
| 11 (20,23,24,26,28–34)                                                        | renal ultrasound in patients with HNF1B       | 237           | 312            | 76% (50-84%)       | Serious <sup>2</sup>      | not serious  | not serious   | not serious  |
| <b>hyperechoic kidneys</b>                                                    |                                               |               |                |                    |                           |              |               |              |
| 6 (20,23,24,31,26,29)                                                         | renal ultrasound in patients with HNF1B       | 137           | 258            | 53% (18-97%)       | Serious <sup>2</sup>      | not serious  | Very serious  | not serious  |
| <b>normal renal size</b>                                                      |                                               |               |                |                    |                           |              |               |              |
| 3 (19,24,35)                                                                  | renal ultrasound in patients with HNF1B       | 105 (kidneys) | 132 (kidneys)  | 62% (44-80%)       | Serious <sup>2</sup>      | not serious  | Serious       | not serious  |
| <b>increased renal size</b>                                                   |                                               |               |                |                    |                           |              |               |              |
| 3 (19,24,35)                                                                  | renal ultrasound in patients with HNF1B       | 4 (kidneys)   | 132 (kidneys)  | 7% (7-80%)         | Serious <sup>3,5</sup>    | not serious  | Very serious  | not serious  |
| <b>unilateral renal agenesis</b>                                              |                                               |               |                |                    |                           |              |               |              |
| 8 (19,23,24,26,28,29,35,36)                                                   | renal ultrasound in patients with HNF1B       | 30            | 319            | 9% (0-75%)         | Serious <sup>2</sup>      | not serious  | Very serious  | not serious  |
| <b>unilateral renal hypoplasia/dysplasia/MCDK</b>                             |                                               |               |                |                    |                           |              |               |              |
| 7 (20,23,29,31–34)                                                            | renal ultrasound in patients with HNF1B       | 37            | 143            | 26% (12-50%)       | very serious <sup>4</sup> | not serious  | not serious   | very serious |
| <b>bilateral renal hypoplasia/dysplasia/MCDK</b>                              |                                               |               |                |                    |                           |              |               |              |
| 7 (20,23,29,31–34)                                                            | renal ultrasound in patients with HNF1B       | 21            | 143            | 15% (0-40%)        | very serious <sup>4</sup> | not serious  | not serious   | very serious |
| <b>radiological findings in patients with HNF1β – disease in adulthood</b>    |                                               |               |                |                    |                           |              |               |              |
| <b>abnormal renal ultrasound</b>                                              |                                               |               |                |                    |                           |              |               |              |
| 6 (20,21,30,37–39)                                                            | renal ultrasound in patients with HNF1B       | 52            | 62             | 84% (50-91%)       | very serious <sup>2</sup> | not serious  | not serious   | not serious  |
| <b>renal cysts</b>                                                            |                                               |               |                |                    |                           |              |               |              |
| 9 (20,21,23,26,30,34,37–39)                                                   | renal ultrasound in patients with HNF1B       | 97            | 146            | 66% (38-86%)       | Serious <sup>2</sup>      | not serious  | not serious   | not serious  |
| <b>hyperechoic kidneys</b>                                                    |                                               |               |                |                    |                           |              |               |              |
| 3 (20,23,26)                                                                  | renal ultrasound in patients with HNF1B       | 9             | 87             | 10% (3-56%)        | Serious                   | not serious  | Serious       | serious      |
| <b>normal renal size</b>                                                      |                                               |               |                |                    |                           |              |               |              |

<sup>5</sup> Small studies; percent of kidneys, not patients

| No of studies & references                                               | Study design                            | N° of events | N° of patients | Event rate (range) | Risk of bias              | Indirectness | Inconsistency | Imprecision  |
|--------------------------------------------------------------------------|-----------------------------------------|--------------|----------------|--------------------|---------------------------|--------------|---------------|--------------|
| 2 (20,21)                                                                | renal ultrasound in patients with HNF1B | 42 (kidneys) | 59 (kidneys)   | 71% (63-89%)       | very serious <sup>3</sup> | not serious  | not serious   | serious      |
| <b>increased renal size</b>                                              |                                         |              |                |                    |                           |              |               |              |
| 2 (20,21)                                                                | renal ultrasound in patients with HNF1B | 4 (kidneys)  | 59 (kidneys)   | 7% (0-10%)         | very serious <sup>3</sup> | not serious  | not serious   | serious      |
| <b>unilateral renal agenesis</b>                                         |                                         |              |                |                    |                           |              |               |              |
| 6 (20,21,21,23,26,34,38)                                                 | renal ultrasound in patients with HNF1B | 17           | 124            | 14% (12-18%)       | Serious <sup>2</sup>      | not serious  | not serious   | serious      |
| <b>unilateral renal hypoplasia/dysplasia/MCDK</b>                        |                                         |              |                |                    |                           |              |               |              |
| 4 (20,21,23,34)                                                          | renal ultrasound in patients with HNF1B | 5            | 57             | 9% (0-18%)         | very serious <sup>4</sup> | not serious  | not serious   | very serious |
| <b>bilateral renal hypoplasia/dysplasia/MCDK</b>                         |                                         |              |                |                    |                           |              |               |              |
| 4 (20,21,23,34)                                                          | renal ultrasound in patients with HNF1B | 10           | 57             | 16% (1-22%)        | very serious <sup>4</sup> | not serious  | not serious   | very serious |
| <b>extrarenal radiological findings in patients with HNF1B – disease</b> |                                         |              |                |                    |                           |              |               |              |
| <b>urinary tract anomalies</b>                                           |                                         |              |                |                    |                           |              |               |              |
| 11 (18–20,22–27,34,38)                                                   | analysis of patients with HNF1B         | 76           | 490            | 16% (6-50%)        | not serious               | not serious  | Serious       | serious      |
| <b>genital malformations</b>                                             |                                         |              |                |                    |                           |              |               |              |
| 15 (18,20–23,25,26,29,30,33,34,40–43)                                    | analysis of patients with HNF1B         | 67           | 428            | 16% (0-71%)        | not serious               | not serious  | Serious       | serious      |
| <b>pancreatic anomalies</b>                                              |                                         |              |                |                    |                           |              |               |              |
| 10 (18,21–23,25,26,29,39,42,44)                                          | analysis of patients with HNF1B         | 67           | 333            | 20% (1-100%)       | not serious               | not serious  | Serious       | serious      |

TOP: termination of pregnancy, HNF1B: hepatocyte nuclear factor 1 beta (=transcription factor 2)



**Table E5 - Literature review on imaging diagnosis of ADPKD in children and young adults**

| Title                                                                                                                    | First Author | Journal                        | Year | Study design                            | N° & type of patients                                                                                                                        | Methodological details                                                                                              | Prediction of genetic diagnosis                                                                                                                                                                                                                                                                      | Risk of bias         | Indirectness | Inconsistency | Imprecision | Other considerations                                | Importance <sup>6</sup> |
|--------------------------------------------------------------------------------------------------------------------------|--------------|--------------------------------|------|-----------------------------------------|----------------------------------------------------------------------------------------------------------------------------------------------|---------------------------------------------------------------------------------------------------------------------|------------------------------------------------------------------------------------------------------------------------------------------------------------------------------------------------------------------------------------------------------------------------------------------------------|----------------------|--------------|---------------|-------------|-----------------------------------------------------|-------------------------|
| <b>Studies in at-risk children and young adults determining sensitivity and specificity compared to genetic analysis</b> |              |                                |      |                                         |                                                                                                                                              |                                                                                                                     |                                                                                                                                                                                                                                                                                                      |                      |              |               |             |                                                     |                         |
| <b>Ultrasound</b>                                                                                                        |              |                                |      |                                         |                                                                                                                                              |                                                                                                                     |                                                                                                                                                                                                                                                                                                      |                      |              |               |             |                                                     |                         |
| <b>PKD 1 only</b>                                                                                                        |              |                                |      |                                         |                                                                                                                                              |                                                                                                                     |                                                                                                                                                                                                                                                                                                      |                      |              |               |             |                                                     |                         |
| Unified criteria for ultrasonographic diagnosis of ADPKD                                                                 | Pei, Y.      | J Am Soc Nephrol. 20(1):205-12 | 2009 | Diagnostic study in at-risk individuals | 113 patients with <i>PKD1</i> mutations aged 15-29 years + similar number of unaffected siblings ( <i>n</i> aged <18 years unspecified).     | Ultrasound with 3 or 5 MHz sector probe. Simulated data set of 1000 patients bootstrapped from the original dataset | <u>≥1 renal cyst:</u><br>sensitivity 99% (97 to 100%)<br>specificity 98% (95 to 100%)<br><u>≥2 renal cysts (uni- or bilateral):</u><br>sensitivity 98% (95 to 100%)<br>specificity 99% (96 to 100%)<br><u>≥3 renal cysts (uni- or bilateral):</u><br>Sensitivity 94% (89 to 98%)<br>Specificity 100% | Serious <sup>7</sup> | Not serious  | Not serious   | Not serious | Partial overlap with Ravine et al and Parfrey et al | 7                       |
| Autosomal dominant polycystic kidney disease types 1 and 2: assessment of US sensitivity for diagnosis                   | Nicolau, C.  | Radiology. 213(1):273-6        | 1999 | Diagnostic study in at-risk individuals | 146 individuals at risk of <i>PKD1</i> aged between 9 months-30 years ( <i>n</i> aged <18 years unspecified). 84 affected and 62 unaffected. | Ultrasound with 3.7 or 5 MHz                                                                                        | <u>≥ 2 (uni-or bilateral) renal cyst:</u><br>sensitivity: 95%<br>Specificity: 100%<br>False negative results: 4/84 (aged 2,3, 5 and 26 years)<br>False positive results: 0/62                                                                                                                        | Serious <sup>7</sup> | Not serious  | Not serious   | Not serious |                                                     | 7                       |

<sup>6</sup> Where 9 is highest and 1 is lowest

<sup>7</sup> No separate analysis for pediatric patients

| Title                                                                                                                       | First Author     | Journal                     | Year | Study design                            | N° & type of patients                                                  | Methodological details                          | Prediction of genetic diagnosis                                                                                                                                                                                                                                                                                                                                                                                                                                                                                   | Risk of bias | Indirectness | Inconsistency | Imprecision | Other considerations                                                        | Importance <sup>6</sup> |
|-----------------------------------------------------------------------------------------------------------------------------|------------------|-----------------------------|------|-----------------------------------------|------------------------------------------------------------------------|-------------------------------------------------|-------------------------------------------------------------------------------------------------------------------------------------------------------------------------------------------------------------------------------------------------------------------------------------------------------------------------------------------------------------------------------------------------------------------------------------------------------------------------------------------------------------------|--------------|--------------|---------------|-------------|-----------------------------------------------------------------------------|-------------------------|
| The use of ultrasonography and linkage studies for early diagnosis of autosomal dominant polycystic kidney disease (ADPKD). | Papadopoulou, D. | Ren Fail. 21(1):67-84       | 1999 | Diagnostic study in at-risk individuals | 33 children with <i>PKD1</i> (n=13 < 12 years and n=23 of 12-19 years) | Ultrasound, not further specified.              | <u>≥ 2 cysts in one kidney plus ≥ 1 in the other:</u><br>< 12 years: sensitivity 23%<br>12-19 years: sensitivity 87%<br>(unaffected children also examined, but as <i>n</i> not given, specificity, NPV and PPV analysis not possible)                                                                                                                                                                                                                                                                            | Not serious  | Not serious  | Not serious   | Not serious | Small sample size. Strict diagnostic criterion.                             | 8                       |
| Utility of ultrasonography in the diagnosis of autosomal dominant polycystic kidney disease in children                     | Gabow, P.A.      | Am Soc Nephrol. 8(1):105-10 | 1997 | Diagnostic study in at-risk individuals | 105 children with risk of <i>PKD1</i> mutation.                        | Ultrasound, not further specified.              | <u>≥1 renal cyst</u> (sensitivity, specificity, false negative rate, false positive rate):<br>all children: 77%, 98%, 25%, 2%<br>3 mths-5 years: 62%, 89%, 38%, 11%<br>5-10 years: 82%, 100%, 19%, 0%<br>10-15 years: 86%, 100%, 23%, 0%<br>15-17.5 years: 67%, 100%, 22%, 0%                                                                                                                                                                                                                                     | Not serious  | Not serious  | Not serious   | Not serious |                                                                             | 8                       |
| Diagnosis of adult polycystic kidney disease by genetic markers and ultrasonographic imaging in a voluntary family register | Elles, R.G.      | J Med Genet. 31(2):115-20.  | 1994 | Diagnostic study in at-risk individuals | 56 persons at risk for <i>PKD1</i> aged < 30 years.                    | Ultrasound with 3.5 MHz linear or sector probe. | <u>Age group &lt; 30 years:</u><br><u>≥ 2 cysts in one kidney plus ≥ 1 in the other:</u><br>Sensitivity 96%<br>Specificity 100%<br>PPV 100%, NPV 97%<br><u>Age class 0-9 years:</u><br>Observed frequency of positive ultrasound 23.5 ± 20% vs predicted frequency of 49%. I.e. evidence for significant rate of false negatives.<br><u>Age class 10-19 years:</u><br>Observed frequency of positive ultrasound 60 ± 13% vs predicted frequency of 43%. I.e. no evidence for significant rate of false negatives. | Not serious  | Not serious  | Not serious   | Not serious | Separate analysis for 0-9 year olds (but <i>n</i> not given for this group) | 8                       |

| Title                                                                                                 | First Author  | Journal                       | Year | Study design                            | N° & type of patients                                                                                                                   | Methodological details                   | Prediction of genetic diagnosis                                                                                                                                                                                                                                                                                                                                                                                                                                                                                                                                                                                                       | Risk of bias         | Indirectness | Inconsistency | Imprecision | Other considerations                                                       | Importance <sup>6</sup> |
|-------------------------------------------------------------------------------------------------------|---------------|-------------------------------|------|-----------------------------------------|-----------------------------------------------------------------------------------------------------------------------------------------|------------------------------------------|---------------------------------------------------------------------------------------------------------------------------------------------------------------------------------------------------------------------------------------------------------------------------------------------------------------------------------------------------------------------------------------------------------------------------------------------------------------------------------------------------------------------------------------------------------------------------------------------------------------------------------------|----------------------|--------------|---------------|-------------|----------------------------------------------------------------------------|-------------------------|
| Evaluation of ultrasonographic diagnostic criteria for autosomal dominant polycystic kidney disease 1 | Ravine, D.    | Lancet 343(8901):824-7.       | 1994 | Diagnostic study in at-risk individuals | 204 previously not examined at-risk individuals of <i>PKD1</i> (of which 37 were aged 15-19 years)                                      | Ultrasound with 3 or 5 MHz sector probe. | <p><u>Age 15-29 years</u> ("similar in 15-19 and 20-29yr olds"):</p> <p>≥ 1 renal cyst: sensitivity 96%</p> <p>≥ 2 (uni-or bilateral) renal cyst: sensitivity 96%</p> <p>≥ 2 cysts in one kidney plus ≥ 1 in the other: Sensitivity 89%</p> <p>≥ 2 cysts in each kidney: sensitivity 8%5</p> <p>≥ 4 cysts in each kidney: sensitivity 81%</p> <p><u>At age 20 years:</u> (PPV and NPV)</p> <p>≥ 1 renal cyst: 100%, 97%</p> <p>≥ 2 (uni-or bilateral) renal cyst: 100%, 97%</p> <p>≥ 2 cysts in one kidney plus ≥ 1 in the other: 100%, 91%</p> <p>≥ 2 cysts in each kidney: 100%, 88%</p> <p>≥ 4 cysts in each kidney: 100%, 85%</p> | Serious <sup>7</sup> | Not serious  | Not serious   | Not serious |                                                                            | 8                       |
| Autosomal dominant polycystic kidney disease: new information for genetic counselling.                | Bear, J.C.    | Am J Med Genet. 43(3):548-53. | 1992 | Diagnostic study in at-risk individuals | 125 children and young adults at risk of <i>PKD1</i> (n=19 0-9 years, n=52 10-19 years, n=54 20-29 years) (overlap with Parfrey et al). | Ultrasound, not further specified.       | <p>≥ 2 cysts in one kidney plus ≥ 1 in the other:</p> <p>Calculated rate of false negative ultrasounds:</p> <p>0-9 years: 36%</p> <p>10-19 years: 8%</p> <p>20-29 years: 0%</p>                                                                                                                                                                                                                                                                                                                                                                                                                                                       | Not serious          | Not serious  | Not serious   | Not serious | Separate analysis for 0-9 and 10-19 year olds. Overlap with Parfrey et al. | 8                       |
| The diagnosis and prognosis of autosomal dominant polycystic kidney disease                           | Parfrey, P.S. | N Engl J Med. 323(16):1085-90 | 1990 | Diagnostic study in at-risk individuals | Individuals at risk of <i>PKD1</i> mutation aged < 30 years. 48 affected and 23 unaffected                                              | Ultrasound, not further specified.       | <p>≥ 2 cysts in one kidney plus ≥ 1 in the other: 40/48 affected and 0/23 unaffected</p> <p><u>Equivocal:</u> 1/48 affected and 1/23 unaffected</p> <p><u>No cysts:</u> 7/48 and 22/23 unaffected</p>                                                                                                                                                                                                                                                                                                                                                                                                                                 | Serious <sup>7</sup> | Not serious  | Not serious   | Not serious |                                                                            | 7                       |

| Title                                                                                                  | First Author | Journal                        | Year | Study design                            | N° & type of patients                                                                                                                     | Methodological details                                                                                              | Prediction of genetic diagnosis                                                                                                                                                                                                                                                                                                                                                          | Risk of bias         | Indirectness | Inconsistency | Imprecision | Other considerations                                | Importance <sup>6</sup> |
|--------------------------------------------------------------------------------------------------------|--------------|--------------------------------|------|-----------------------------------------|-------------------------------------------------------------------------------------------------------------------------------------------|---------------------------------------------------------------------------------------------------------------------|------------------------------------------------------------------------------------------------------------------------------------------------------------------------------------------------------------------------------------------------------------------------------------------------------------------------------------------------------------------------------------------|----------------------|--------------|---------------|-------------|-----------------------------------------------------|-------------------------|
| <b>PKD 2 only</b>                                                                                      |              |                                |      |                                         |                                                                                                                                           |                                                                                                                     |                                                                                                                                                                                                                                                                                                                                                                                          |                      |              |               |             |                                                     |                         |
| Unified criteria for ultrasonographic diagnosis of ADPKD                                               | Pei, Y.      | J Am Soc Nephrol. 20(1):205-12 | 2009 | Diagnostic study in at-risk individuals | 41 patients with <i>PKD2</i> mutations aged 15-29 years + similar number of unaffected siblings ( <i>n</i> aged <18 years unspecified).   | Ultrasound with 3 or 5 MHz sector probe. Simulated data set of 1000 patients bootstrapped from the original dataset | <u>≥1 renal cyst:</u><br>sensitivity 79% (67% to 90%)<br>specificity 97% (91% to 100%)<br><u>≥2 renal cysts (uni- or bilateral):</u><br>Sensitivity 72% (59% to 83%)<br>Specificity 100%<br><u>≥3 renal cysts (uni- or bilateral):</u><br>Sensitivity 70% (57% to 81%)<br>Specificity 100%<br>3 truly pediatric patients (aged 16 and 17) are affected by <i>PKD2</i> but have NO cysts. | Serious <sup>7</sup> | Not serious  | Not serious   | Not serious | Partial overlap with Ravine et al and Parfrey et al | 7                       |
| Autosomal dominant polycystic kidney disease types 1 and 2: assessment of US sensitivity for diagnosis | Nicolau, C.  | Radiology. 213(1):273-6.       | 1999 | Diagnostic study in at-risk individuals | 15 individuals at risk of <i>PKD2</i> aged between 9 months-30 years ( <i>n</i> aged <18 years unspecified). 6 affected and 9 unaffected. | Ultrasound with 3.7 or 5 MHz                                                                                        | <u>≥ 2 (uni-or bilateral) renal cyst:</u><br>sensitivity: 67%<br>Specificity: 100%<br>False negative results: 2/16 (aged 5 and 10 years)<br>False positive results: 0/9                                                                                                                                                                                                                  | Serious <sup>7</sup> | Not serious  | Not serious   | Not serious |                                                     | 7                       |

| Title                                                                                                  | First Author | Journal                        | Year | Study design                                                 | N° & type of patients                                                                                                                                                                       | Methodological details                                                                                                                                           | Prediction of genetic diagnosis                                                                                                                                                                                                                                                                                                                                                                                                                                     | Risk of bias                            | Indirectness | Inconsistency | Imprecision | Other considerations                                | Importance <sup>6</sup> |
|--------------------------------------------------------------------------------------------------------|--------------|--------------------------------|------|--------------------------------------------------------------|---------------------------------------------------------------------------------------------------------------------------------------------------------------------------------------------|------------------------------------------------------------------------------------------------------------------------------------------------------------------|---------------------------------------------------------------------------------------------------------------------------------------------------------------------------------------------------------------------------------------------------------------------------------------------------------------------------------------------------------------------------------------------------------------------------------------------------------------------|-----------------------------------------|--------------|---------------|-------------|-----------------------------------------------------|-------------------------|
| <b>Known familial ADPKD but unknown genotype</b>                                                       |              |                                |      |                                                              |                                                                                                                                                                                             |                                                                                                                                                                  |                                                                                                                                                                                                                                                                                                                                                                                                                                                                     |                                         |              |               |             |                                                     |                         |
| Unified criteria for ultrasonographic diagnosis of ADPKD                                               | Pei, Y.      | J Am Soc Nephrol. 20(1):205-12 | 2009 | Diagnostic study in at-risk individuals                      | 15-29 year olds out of 577 <i>PKD1</i> and 371 <i>PKD2</i> -at-risk individuals ( <i>n</i> aged <18yr unspecified).                                                                         | Ultrasound with 3 or 5 MHz sector probe. Simulated data set of 1000 patients bootstrapped from the original dataset. Case-mix: 85% <i>PKD1</i> , 15% <i>PKD2</i> | <p><u>≥1 renal cyst:</u><br/>sensitivity 89% (84% to 94%)<br/>specificity 97% (94% to 99%)</p> <p><u>≥2 renal cysts (uni- or bilateral):</u><br/>Sensitivity 85% (79% to 91%)<br/>Specificity 99% (98% to 100%)</p> <p><u>≥3 renal cysts (uni- or bilateral):</u><br/>Sensitivity 82% (75% to 88%)<br/>Specificity 100%</p>                                                                                                                                         | Serious Error!<br>Bookmark not defined. | Not serious  | Not serious   | Not serious | Partial overlap with Ravine et al and Parfrey et al | 7                       |
| Autosomal dominant polycystic kidney disease types 1 and 2: assessment of US sensitivity for diagnosis | Nicolau, C.  | Radiology. 213(1):273-6.       | 1999 | Diagnostic study in at-risk individuals                      | 161 individuals at risk of <i>PKD1</i> (91%) of <i>PKD2</i> (9%) aged 9 months - 30 years (37 aged <16 years). 90 affected and 71 unaffected.                                               | Ultrasound with 3.7 or 5 MHz                                                                                                                                     | <p><u>≥ 2 (uni-or bilateral) renal cyst:</u><br/>sensitivity: 93%<br/>Specificity: 100%<br/>False negative results: 6/90<br/>False positive results: 0/71</p>                                                                                                                                                                                                                                                                                                       | Serious <sup>7</sup>                    | Not serious  | Not serious   | Not serious |                                                     | 7                       |
| <b>High-resolution ultrasound</b>                                                                      |              |                                |      |                                                              |                                                                                                                                                                                             |                                                                                                                                                                  |                                                                                                                                                                                                                                                                                                                                                                                                                                                                     |                                         |              |               |             |                                                     |                         |
| Imaging-based diagnosis of autosomal dominant polycystic kidney disease                                | Pei, Y.      | J Am Soc Nephrol. 26(3):746-53 | 2015 | Diagnostic study in at-risk individuals and healthy controls | 37 patients with ADPKD and 58 unaffected (healthy siblings and controls), aged 16-29 years. 56% have truncating <i>PKD1</i> , 22% non-truncating <i>PKD1</i> and 22% <i>PKD2</i> mutations. | High resolution ultrasound with 3.8 to 8 MHz probes                                                                                                              | <p>Sensitivity, specificity, PPV and NPV:<br/><u>≥ 1 renal cyst:</u> 97%, 85%, 80%, 98%<br/><u>≥ 2 (uni-or bilateral) renal cysts:</u> 97%, 95%, 92%, 98%<br/><u>≥ 3 (uni-or bilateral) renal cysts:</u> 97%, 98%, 97%, 98%<br/><u>≥ 4 (uni-or bilateral) renal cysts:</u> 97%, 98%, 97%, 98%<br/><u>≥ 2 cysts in each kidney:</u> 97%, 100%, 100%, 98%<br/>Compared to conventional ultrasound (Pei 2009): better sensitivity, but slightly lower specificity.</p> | Serious <sup>7</sup>                    | Not serious  | Not serious   | Not serious | Exact n < 18 years not mentioned                    | 7                       |

| Title                                                                                                  | First Author | Journal                         | Year | Study design                                                 | N° & type of patients                                                                                                                                                                       | Methodological details                                                               | Prediction of genetic diagnosis                                                                                                                                                                                                                                                                                                                                                                                                             | Risk of bias                               | Indirectness | Inconsistency | Imprecision             | Other considerations             | Importance <sup>6</sup> |
|--------------------------------------------------------------------------------------------------------|--------------|---------------------------------|------|--------------------------------------------------------------|---------------------------------------------------------------------------------------------------------------------------------------------------------------------------------------------|--------------------------------------------------------------------------------------|---------------------------------------------------------------------------------------------------------------------------------------------------------------------------------------------------------------------------------------------------------------------------------------------------------------------------------------------------------------------------------------------------------------------------------------------|--------------------------------------------|--------------|---------------|-------------------------|----------------------------------|-------------------------|
| <b>MRI</b>                                                                                             |              |                                 |      |                                                              |                                                                                                                                                                                             |                                                                                      |                                                                                                                                                                                                                                                                                                                                                                                                                                             |                                            |              |               |                         |                                  |                         |
| Imaging-based diagnosis of autosomal dominant polycystic kidney disease                                | Pei, Y.      | J Am Soc Nephrol. 26(3):746-53  | 2015 | Diagnostic study in at-risk individuals and healthy controls | 37 patients with ADPKD and 58 unaffected (healthy siblings and controls), aged 16-29 years. 56% have truncating <i>PKD1</i> , 22% non-truncating <i>PKD1</i> and 22% <i>PKD2</i> mutations. | T2 weighted, fast-spin echo sequence without gadolinium on 1.5 Tesla scanner         | Sensitivity, specificity, PPV and NPV:<br><u>≥ 5 (uni-or bilateral) renal cysts:</u> 100%, 98%, 97%, 100%<br><u>&gt; 10 (uni-or bilateral) renal cysts:</u> 100%, 100%, 100%, 100%<br><u>≥ 2 cysts in each kidney:</u> 100%, 98%, 97%, 100%<br><br>Suggest to use >10 cysts as diagnostic criterion in individuals at risk of ADPKD, and stricter <5 criterion for exclusion of ADPKD in potential living related kidney donors.            | Serious <sup>7</sup>                       | Not serious  | Not serious   | Not serious             | Exact n < 18 years not mentioned | 7                       |
| <b>Studies in at-risk children without genetic diagnostics but follow-up ultrasound</b>                |              |                                 |      |                                                              |                                                                                                                                                                                             |                                                                                      |                                                                                                                                                                                                                                                                                                                                                                                                                                             |                                            |              |               |                         |                                  |                         |
| Renal ultrasonographic evaluation in children at risk of autosomal dominant polycystic kidney disease. | Reed, B.     | Am J Kidney Dis. 56(1):50-6     | 2010 | Cohort study of at-risk children                             | 420 children (mean age 8.3 ± 4.2 years)                                                                                                                                                     | No genetic diagnostics.<br><br>3 groups: no cysts/ unilateral cysts/ bilateral cysts | Initially 227/420 children did not have cysts, but 10/43 (23%) with follow-up at age > 15 years and 14/77 (18%) with follow-up at age ≤ 15 years later developed bilateral cysts.<br><br>Initially 43/420 children only had unilateral cysts. Of these 2/8 (25%) with follow-up at age > 15 years and 17/26 (65%) with follow-up at age ≤ 15 years later developed bilateral cysts. However, 3/34 (7%) did not have any cysts on follow-up. | Selected group                             | Not serious  | Not serious   | No genetic diagnostics. |                                  | 5                       |
| The spectrum of autosomal dominant polycystic kidney disease in children.                              | Fick, G.M.   | J Am Soc Nephrol. 4(9):1654-60. | 1994 | Cohort study of at-risk children                             | 39 children with follow-up out of 154 children from families with clinical ADPKD                                                                                                            | No genetic diagnostics.<br><br>Diagnostic criterion ≥ 1 cyst.                        | Of 17 children without cysts, none developed cysts on follow-up.<br>Of 4 children with only 1 cyst, 3 developed bilateral cysts on follow-up (mean 4 years later).<br>Of 22 with ≥ 1 cyst, none had no cysts on follow-up.                                                                                                                                                                                                                  | Probably biased towards more severe cases. | Not serious  | Not serious   | No genetic diagnostics. |                                  | 5                       |

| Title                                                                                         | First Author | Journal                      | Year | Study design                     | N° & type of patients                                                            | Methodological details                                         | Prediction of genetic diagnosis                                                                                                                                                                                                                                            | Risk of bias                                     | Indirectness | Inconsistency                    | Imprecision             | Other considerations             | Importance <sup>6</sup> |
|-----------------------------------------------------------------------------------------------|--------------|------------------------------|------|----------------------------------|----------------------------------------------------------------------------------|----------------------------------------------------------------|----------------------------------------------------------------------------------------------------------------------------------------------------------------------------------------------------------------------------------------------------------------------------|--------------------------------------------------|--------------|----------------------------------|-------------------------|----------------------------------|-------------------------|
| Autosomal dominant polycystic kidney disease in childhood: a longitudinal study.              | Sedman, A.   | Kidney Int. 31(4):1000-5     | 1987 | Cohort study of at-risk children | 68 children with follow-up out of 154 children from families with clinical ADPKD | No genetic diagnostics.<br><br>Diagnostic criterion > 5 cysts. | Of 37 children without cysts, 3 developed < 5 cysts and 4 developed > 5 cysts after age 18 years.<br>Of 12 children with < 5 cysts, 2 were classified normal and 4 developed > 5 cysts after age 18 years.<br>Of 19 children with > 5 cysts, none were reclassified later. | Unusually severely affected cohort (3 with ESRD) | Not serious  | Very strict diagnostic criterion | No genetic diagnostics. | Very strict diagnostic criterion | 5                       |
| <b>Studies in affected children</b>                                                           |              |                              |      |                                  |                                                                                  |                                                                |                                                                                                                                                                                                                                                                            |                                                  |              |                                  |                         |                                  |                         |
| <b>PKD 1</b>                                                                                  |              |                              |      |                                  |                                                                                  |                                                                |                                                                                                                                                                                                                                                                            |                                                  |              |                                  |                         |                                  |                         |
| Genotype-phenotype correlation in children with autosomal dominant polycystic kidney disease. | Fencl, F.    | Pediatr Nephrol. 24(5):983-9 | 2009 | Cohort study in patients         | 50 Patients with <i>PKD1</i> (and positive family history)                       | mean age at diagnosis 5.4 ± 4.3 years                          | Total number of cysts: mean 13.39 ± 12.53<br>Bilateral renal cysts: n=43 (86%)<br>Enlarged kidneys: n= 16 (32%)<br>Diameter of the biggest cyst: 16.79 ± 10.65 mm                                                                                                          | Selected group                                   | Not serious  | Not serious                      | Not serious             |                                  | 3                       |
| <b>PKD 2</b>                                                                                  |              |                              |      |                                  |                                                                                  |                                                                |                                                                                                                                                                                                                                                                            |                                                  |              |                                  |                         |                                  |                         |
| Genotype-phenotype correlation in children with autosomal dominant polycystic kidney disease. | Fencl, F.    | Pediatr Nephrol. 24(5):983-9 | 2009 | Cohort study in patients         | 10 patients with <i>PKD2</i> (and positive family history)                       | mean age at diagnosis 7.9 ± 5.0 years                          | Total number of cysts: mean 3.00 ± 2.10<br>Bilateral renal cysts: n= 3 (30%)<br>Enlarged kidneys: n= 0 (0%)<br>Diameter of the biggest cyst: mean 5.08 ± 1.53 mm                                                                                                           | Small study                                      | Not serious  | Not serious                      | Not serious             |                                  | 3                       |

ADPKD: autosomal dominant polycystic kidney disease.

ESRD: end stage renal disease

NPV: negative predictive value

PPV: positive predictive value

**Table E6 - Literature summary on cysts in children with tuberous sclerosis complex**

| No of Studies & References                                       | Study designs                                                | Incidence of cysts (range across studies) | Incidence of AML (range across studies) | Risk of bias               | Indirectness | Inconsistency | Imprecision           | Other considerations                                         |
|------------------------------------------------------------------|--------------------------------------------------------------|-------------------------------------------|-----------------------------------------|----------------------------|--------------|---------------|-----------------------|--------------------------------------------------------------|
| <b>Exclusively pediatric cohorts</b>                             |                                                              |                                           |                                         |                            |              |               |                       |                                                              |
| 7 (45–51)                                                        | Mainly retrospective cohort studies, 1 cross sectional study | 70/313 = 22%<br>(5 – 30%)                 | 114/255 = 45%<br>(26 – 62%)             | Not serious <sup>8</sup>   | Not serious  | Not serious   | Serious <sup>9</sup>  | 2 older ultrasound studies have similar rates to MRI studies |
| <b>Mixed pediatric and adult cohorts</b>                         |                                                              |                                           |                                         |                            |              |               |                       |                                                              |
| 9 (48,51–58)                                                     | 1 prospective registry (65% of patients), 8 cohort studies.  | 879/3198 = 27%<br>(25 – 47%)              | 1585/3166 = 50%<br>(40 – 87%)           | Not serious                | Not serious  | Not serious   | Not serious           | Children mostly not reported separately                      |
| <b>Children with TSC2/PKD1 contiguous gene deletion syndrome</b> |                                                              |                                           |                                         |                            |              |               |                       |                                                              |
| 5 (47,50,59–61)                                                  | Cohort studies, mostly in selected populations               | 29/30 = 97%<br>(67 – 100%)                | 9/27 = 33 %<br>(0 – 86%)                | Very serious <sup>10</sup> | Not serious  | Serious       | Serious <sup>11</sup> |                                                              |

<sup>8</sup> Despite fact that mostly small cohorts from referral centers

<sup>9</sup> Increase of incidence across childhood years in most studies

<sup>10</sup> Very small patient numbers. Single patient without cysts only followed up to age 4.5 years. Early studies only perform genetics in those with early severe cysts.

<sup>11</sup> Very small patient numbers. AMLs hard to visualize among multiple cysts (therefore incidence depends on quality of imaging)



**Table E7 – search strategies and number of papers screened for systematic literature reviews**

| Table No                                                    | MEDLINE search terms                                                                                                                                                                                                                                  | No of items screened | Inclusion criteria                                                                                      | Exclusion criteria                                                  | Going back to                                           | No of studies included <sup>12</sup> |
|-------------------------------------------------------------|-------------------------------------------------------------------------------------------------------------------------------------------------------------------------------------------------------------------------------------------------------|----------------------|---------------------------------------------------------------------------------------------------------|---------------------------------------------------------------------|---------------------------------------------------------|--------------------------------------|
| <b>S2 – CEUS in cystic kidney disease</b>                   | ((((((ultrasound) OR sonography)) AND contrast)) AND ((kidney) OR renal)) AND cyst*                                                                                                                                                                   | 334                  | Studies with at least some cystic and some benign renal lesions (i.e. not only solid or only malignant) | case reports, conference abstracts, non-English                     | Up to and including meta-analysis by Wang et al in 2014 | 22                                   |
|                                                             | Bosniak AND child*                                                                                                                                                                                                                                    | 16                   |                                                                                                         |                                                                     |                                                         |                                      |
| <b>S3 – diagnosis of ADPKD in children and young adults</b> | ("ADPKD" or "dominant AND polycystic") AND "screening"                                                                                                                                                                                                | 764                  | Genetically confirmed diagnosis of ADPKD                                                                | Studies with purely histological diagnosis of ADPKD                 | No age limit                                            | 17                                   |
|                                                             | Papers before June 2014 extracted from the systematic literature review in Rangan, G.K. et al. "KHA-CARI Autosomal Dominant Polycystic Kidney Disease Guideline: Screening for Polycystic Kidney Disease" Seminars in Nephrology 2015; 35(6), 557-564 |                      |                                                                                                         |                                                                     |                                                         |                                      |
| <b>S4 – manifesta</b>                                       | (((HNF1β) OR hnf1 beta) OR TCF2) OR TCF 2) AND imag*                                                                                                                                                                                                  | 37                   | Studies in humans. At least 5-                                                                          | Case reports < 5 patients. No human data. No radiological findings. | No age limit (HNF1β discovered in                       | 28                                   |

<sup>12</sup> Systematic review counts as single study

|                                                  |                                                                                                                                    |     |                                                                                                   |                                                                                                                                                                                                                                   |                                                               |    |
|--------------------------------------------------|------------------------------------------------------------------------------------------------------------------------------------|-----|---------------------------------------------------------------------------------------------------|-----------------------------------------------------------------------------------------------------------------------------------------------------------------------------------------------------------------------------------|---------------------------------------------------------------|----|
| <b>tions of HNF1B disease on medical imaging</b> | ((((((HNF1β) OR hnf1 beta) OR HNF1β) OR tcf2) OR tcf 2) AND ("1997/08/01"[PDat] : "2017/08/01"[PDat] ) AND Humans[Mesh])) AND ren* | 186 | 10 patients for major feature (renal phenotype).<br>At least 2 patients for extrarenal phenotypes | Incidence of diabetes, liver function test abnormalities, hypomagnesemia and hyperuricemia not listed, because they are not imaging findings.<br>Early onset gout and malignancy not included because not relevant in pediatrics. | 1997).                                                        |    |
|                                                  | Relevant papers from references                                                                                                    |     |                                                                                                   |                                                                                                                                                                                                                                   |                                                               |    |
| <b>S6 – malignancy in MCDK</b>                   | "Multicystic dysplastic kidney" or "MCDK"                                                                                          | 833 |                                                                                                   | Case reports                                                                                                                                                                                                                      | Up to and including systematic review by Narchi et al in 2005 | 16 |

## ***Suggestions for further research***

### **Simple and complex cysts**

- Examine prevalence of simple and complex cysts at different ages in different populations
- Evaluate long-term outcome of children with simple / single cysts
- Examine the role of CEUS in the diagnostic workup of pediatric cystic kidney tumors

### **Cystic dysplasia**

- Examine the correlation of renal size and volume to long-term functional outcome in renal hypo/dysplasia

### **ARPKD and ADPKD:**

- Establish prognostically relevant disease classification for children with ARPKD and ADPKD
- Establish diagnostic imaging criteria for ADPKD in children
- Evaluate the utility of high-resolution US and/or MRI for more sensitive evaluation of cyst progression in children with ADPKD and ARPKD
- Explore the role of liver (and kidney) elastography in ARPKD
- Explore the role of 3D volumetric US to monitor progression of ADPKD
- Establish the natural history of kidney growth and function in ARPKD and ADPKD in unbiased populations

### **TSC**

- Investigate the pathogenesis of renal failure in *TSC2/PKD1* CGS aside from renal cysts; explain discordant radiological findings compared to ADPKD.
- Describe/follow the growth of cysts in *TSC2/PKD1* CGS in a multinational cohort

### **Nephronophthisis**

- Examine the prevalence of liver disease in children with nephronophthisis
- Explore the role of liver elastography in nephronophthisis

### **Bardet-Biedl syndrome**

- Investigate the pathogenesis of the variable kidney phenotypes

## **References for Supplementary Material**

1. Guyatt GH, Oxman AD, Vist GE, et al. GRADE: an emerging consensus on rating quality of evidence and strength of recommendations. *BMJ*. 2008;336(7650):924–926.
2. Narchi H. Risk of Wilms' tumour with multicystic kidney disease: a systematic review. *Arch Dis Child*. 2005;90(2):147–149.
3. Carazo-Palacios ME, Couselo-Jerez M, Serrano-Durbá A, et al. Displasia renal multiquística: evaluación de la necesidad de la gammagrafía renal y seguridad del tratamiento conservador. *Actas Urológicas Españolas*. 2017;41(1):62–67.
4. Mashat SD, El-Desoky SM, Abdulaziz Kari J. Outcome of Multi-Cystic Dysplastic Kidneys in Children. *Iran J Pediatr*. 2015;25(5)<http://www.ncbi.nlm.nih.gov/pmc/articles/PMC4610334/>. Accessed July 7, 2017.
5. Sarhan OM, Alghanbar M, Alsulaim A, Alharbi B, Alotay A, Nakshabandi Z. Multicystic dysplastic kidney: Impact of imaging modality selection on the initial management and prognosis. *J Pediatr Urol*. 2014;10(4):645–649.
6. Eickmeyer AB, Casanova NF, He C, et al. The natural history of the multicystic dysplastic kidney – Is limited follow-up warranted? *Journal of Pediatric Urology*. 2014;10(4):655–661.
7. Doğan ÇS, Torun-Bayram M, Aybar MD. Unilateral multicystic dysplastic kidney in children. *Turk J Pediatr*. 2014;56(1):75–79.
8. Moralioğlu S, Celayir AC, Bosnalı O, Pektaş OZ, Bulut IK. Single center experience in patients with unilateral multicystic dysplastic kidney. *J Pediatr Urol*. 2014;10(4):763–768.
9. Sharada S, Vijayakumar M, Nageswaran P, Ekambaram S, Udani A. Multicystic dysplastic kidney: a retrospective study. *Indian Pediatr*. 2014;51(8):641–643.
10. Hayes WN, Watson AR, Group T& AMS. Unilateral multicystic dysplastic kidney: does initial size matter? *Pediatr Nephrol*. 2012;27(8):1335–1340.
11. Caldeira F, Juvandes C, Pinto M, Braga M, Calhau P. [Multicystic dysplastic kidney. In defense of a conservative experience]. *Acta Med Port*. 2011;24 Suppl 2:549–556.
12. Chiappinelli A, Savanelli A, Farina A, Settmi A. Multicystic dysplastic kidney: our experience in non-surgical management. *Pediatr Surg Int*. 2011;27(7):775.
13. Mansoor O, Chandar J, Rodriguez MM, et al. Long-term risk of chronic kidney disease in unilateral multicystic dysplastic kidney. *Pediatr Nephrol*. 2011;26(4):597–603.
14. Singh JK, Kanojia RP, Narasimhan KL. Multicystic dysplastic kidney in children — A need for conservative and long term approach. *Indian J Pediatr*. 2009;76(8):809.
15. Kiyak A, Yilmaz A, Turhan P, Sander S, Aydin G, Aydogan G. Unilateral multicystic dysplastic kidney: single-center experience. *Pediatr Nephrol*. 2009;24(1):99–104.

16. Weinstein A, Goodman TR, Iragorri S. Simple multicystic dysplastic kidney disease: end points for subspecialty follow-up. *Pediatr Nephrol*. 2008;23(1):111–116.
17. Rabelo EAS, Oliveira EA, Diniz JSS, et al. Natural history of multicystic kidney conservatively managed: a prospective study. *Pediatr Nephrol*. 2004;19(10):1102–1107.
18. Edghill EL, Oram RA, Owens M, et al. Hepatocyte nuclear factor-1 $\beta$  gene deletions—a common cause of renal disease. *Nephrol Dial Transplant*. 2008;23(2):627–635.
19. Adalat S, Woolf AS, Johnstone KA, et al. HNF1B Mutations Associate with Hypomagnesemia and Renal Magnesium Wasting. *J Am Soc Nephrol*. 2009;20(5):1123–1131.
20. Heidet L, Decramer S, Pawtowski A, et al. Spectrum of HNF1B Mutations in a Large Cohort of Patients Who Harbor Renal Diseases. *CJASN*. 2010;5(6):1079–1090.
21. Faguer S, Decramer S, Chassaing N, et al. Diagnosis, management, and prognosis of HNF1B nephropathy in adulthood. *Kidney International*. 2011;80(7):768–776.
22. Madariaga L, Morinière V, Jeanpierre C, et al. Severe Prenatal Renal Anomalies Associated with Mutations in HNF1B or PAX2 Genes. *CJASN*. 2013;8(7):1179–1187.
23. Faguer S, Chassaing N, Bandin F, et al. The HNF1B score is a simple tool to select patients for HNF1B gene analysis. *Kidney International*. 2014;86(5):1007–1015.
24. Avni FE, Lahoche A, Langlois C, Garel C, Hall M, Vivier P-H. Renal involvement in children with HNF1 $\beta$  mutation: Early sonographic appearances and long-term follow-up. *Eur Radiol*. 2015;25(5):1479–1486.
25. Duval H, Michel-Calemard L, Gonzales M, et al. Fetal anomalies associated with HNF1B mutations: report of 20 autopsy cases. *Prenat Diagn*. 2016;36(8):744–751.
26. Clissold R, Shields B, Ellard S, Hattersley A, Bingham C. Assessment of the HNF1B Score as a Tool to Select Patients for HNF1B Genetic Testing. *NEF*. 2015;130(2):134–140.
27. Decramer S, Parant O, Beaufils S, et al. Anomalies of the TCF2 Gene Are the Main Cause of Fetal Bilateral Hyperechogenic Kidneys. *JASN*. 2007;18(3):923–933.
28. Nagamani SCS, Erez A, Shen J, et al. Clinical spectrum associated with recurrent genomic rearrangements in chromosome 17q12. *Eur J Hum Genet*. 2009;18(3):278–284.
29. Bellanné-Chantelot C, Chauveau D, Gautier J-F, et al. Clinical Spectrum Associated with Hepatocyte Nuclear Factor-1 $\beta$  Mutations. *Annals of Internal Medicine*. 2004;140(7):510.
30. Edghill EL, Bingham C, Ellard S, Hattersley AT. Mutations in hepatocyte nuclear factor-1 $\beta$  and their related phenotypes. *Journal of Medical Genetics*. 2006;43(1):84–90.

31. Ulinski T, Lescure S, Beaufile S, et al. Renal Phenotypes Related to Hepatocyte Nuclear Factor-1 $\beta$  (TCF2) Mutations in a Pediatric Cohort. *JASN*. 2006;17(2):497–503.
32. Weber S, Moriniere V, Knüppel T, et al. Prevalence of Mutations in Renal Developmental Genes in Children with Renal Hypodysplasia: Results of the ESCAPE Study. *JASN*. 2006;17(10):2864–2870.
33. Nakayama M, Nozu K, Goto Y, et al. HNF1B alterations associated with congenital anomalies of the kidney and urinary tract. *Pediatr Nephrol*. 2010;25(6):1073–1079.
34. Raaijmakers A, Corveleyn A, Devriendt K, et al. Criteria for HNF1B analysis in patients with congenital abnormalities of kidney and urinary tract. *Nephrol Dial Transplant*. 2015;30(5):835–842.
35. Audrézet M-P, Corbiere C, Lebbah S, et al. Comprehensive PKD1 and PKD2 Mutation Analysis in Prenatal Autosomal Dominant Polycystic Kidney Disease. *JASN*. 2016;27(3):722–729.
36. Hogan J, Dourthe M-E, Blondiaux E, Jouannic J-M, Garel C, Ulinski T. Renal outcome in children with antenatal diagnosis of severe CAKUT. *Pediatr Nephrol*. 2011;27(3):497–502.
37. Poitou C, Francois H, Bellanne-Chantelot C, et al. Maturity onset diabetes of the young: clinical characteristics and outcome after kidney and pancreas transplantation in MODY3 and RCAD patients: a single center experience. *Transplant International*. 2012;25(5):564–572.
38. Kanthimathi S, Balamurugan K, Mohan V, Shanthirani CS, Gayathri V, Radha V. Identification and Molecular Characterization of HNF1B Gene Mutations in Indian Diabetic Patients with Renal Abnormalities. *Annals of Human Genetics*. 2015;79(1):10–19.
39. Tjora E, Wathle G, Erchinger F, et al. Exocrine pancreatic function in hepatocyte nuclear factor 1 $\beta$ -maturity-onset diabetes of the young (HNF1B-MODY) is only moderately reduced: compensatory hypersecretion from a hypoplastic pancreas. *Diabet Med*. 2013;30(8):946–955.
40. Bingham C, Ellard S, Cole TRP, et al. Solitary functioning kidney and diverse genital tract malformations associated with hepatocyte nuclear factor-1 $\beta$  mutations. *Kidney International*. 2002;61(4):1243–1251.
41. Bellanné-Chantelot C, Clauin S, Chauveau D, et al. Large genomic rearrangements in the hepatocyte nuclear factor-1beta (TCF2) gene are the most frequent cause of maturity-onset diabetes of the young type 5. *Diabetes*. 2005;54(11):3126–3132.
42. Haumaitre C, Fabre M, Cormier S, Baumann C, Delezoide A-L, Cereghini S. Severe pancreas hypoplasia and multicystic renal dysplasia in two human fetuses carrying novel HNF1 $\beta$ /MODY5 mutations. *Hum Mol Genet*. 2006;15(15):2363–2375.
43. Lindner TH, Njølstad PR, Horikawa Y, Bostad L, Bell GI, Søvik O. A Novel Syndrome of Diabetes Mellitus, Renal Dysfunction and Genital Malformation Associated with a Partial Deletion of the Pseudo-POU Domain of Hepatocyte Nuclear Factor-1 $\beta$ . *Hum Mol Genet*. 1999;8(11):2001–2008.
44. Body-Bechou D, Loget P, D’Herve D, et al. TCF2/HNF-1beta mutations: 3 cases of fetal severe pancreatic agenesis or hypoplasia and multicystic renal dysplasia. *Prenat Diagn*. 2014;34(1):90–93.

45. Korula S, Ekbote A, Kumar N, Danda S, Agarwal I, Chaturvedi S. Renal manifestations of tuberous sclerosis among children: an Indian experience and review of the literature. *Clin Kidney J.* 2014;7(2):134–137.
46. Bai D, Zhao J, Li L, Gao J, Wang X. Analysis of genotypes and phenotypes in Chinese children with tuberous sclerosis complex. *Sci China Life Sci.* 2017;60(7):763–771.
47. Castagnetti M, Vezzù B, Laverda A, Zampieri S, Rigamonti W. Urological Counseling and Followup in Pediatric Tuberous Sclerosis Complex. *The Journal of Urology.* 2007;178(5):2155–2159.
48. O’Callaghan FJ, Noakes MJ, Martyn CN, Osborne JP. An epidemiological study of renal pathology in tuberous sclerosis complex. *BJU International.* 2004;94(6):853–857.
49. Ewalt DH, Sheffield E, Sparagana SP, Delgado MR, Roach ES. Renal lesion growth in children with tuberous sclerosis complex. *J Urol.* 1998;160(1):141–145.
50. Robert A, Leroy V, Riquet A, Gogneaux L, Boutry N, Avni FE. Renal involvement in tuberous sclerosis complex with emphasis on cystic lesions. *Radiol med.* 2016;121(5):402–408.
51. Cook JA, Oliver K, Mueller RF, Sampson J. A cross sectional study of renal involvement in tuberous sclerosis. *Journal of Medical Genetics.* 1996;33(6):480–484.
52. Rakowski SK, Winterkorn EB, Paul E, Steele DJR, Halpern EF, Thiele EA. Renal manifestations of tuberous sclerosis complex: Incidence, prognosis, and predictive factors. *Kidney International.* 2006;70(10):1777–1782.
53. Kingswood JC, d’Augères GB, Belousova E, et al. Tuberous Sclerosis registry to increase disease Awareness (TOSCA) – baseline data on 2093 patients. *Orphanet Journal of Rare Diseases.* 2017;12:2.
54. Casper KA, Donnelly LF, Chen B, Bissler JJ. Tuberous Sclerosis Complex: Renal Imaging Findings. *Radiology.* 2002;225(2):451–456.
55. Au KS, Williams AT, Roach ES, et al. Genotype/phenotype correlation in 325 individuals referred for a diagnosis of tuberous sclerosis complex in the United States. *Genet Med.* 2007;9(2):88–100.
56. Sancak O, Nellist M, Goedbloed M, et al. Mutational analysis of the TSC1 and TSC2 genes in a diagnostic setting: genotype – phenotype correlations and comparison of diagnostic DNA techniques in Tuberous Sclerosis Complex. *Eur J Hum Genet.* 2005;13(6):731–741.
57. Dabora SL, Jozwiak S, Franz DN, et al. Mutational Analysis in a Cohort of 224 Tuberous Sclerosis Patients Indicates Increased Severity of TSC2, Compared with TSC1, Disease in Multiple Organs. *The American Journal of Human Genetics.* 2001;68(1):64–80.
58. Stillwell TJ, Gomez MR, Kelalis PP. Renal lesions in tuberous sclerosis. *J Urol.* 1987;138(3):477–481.
59. Brook-Carter PT, Peral B, Ward CJ, et al. Deletion of the TSC2 and PKD1 genes associated with severe infantile polycystic kidney disease — a contiguous gene syndrome. *Nat Genet.* 1994;8(4):328–332.



60. Back SJ, Andronikou S, Kilborn T, Kaplan BS, Darge K. Imaging features of tuberous sclerosis complex with autosomal-dominant polycystic kidney disease: a contiguous gene syndrome. *Pediatr Radiol.* 2015;45(3):386–395.
61. Sampson JR, Maheshwar MM, Aspinwall R, et al. Renal cystic disease in tuberous sclerosis: role of the polycystic kidney disease 1 gene. *Am J Hum Genet.* 1997;61(4):843–851.
